# Supplementary material for: Consultation skills development in general practice: findings from a qualitative study of newly recruited and more experienced clinical pharmacists during the COVID-19 pandemic
Source: PubMed Central journal article supplement — BMJ Open. 2023 Apr 13;13(4):e069017. doi: 10.1136/bmjopen-2022-069017 (PMC10439346; doi:10.1136/bmjopen-2022-069017), 2023-04-13
Supplement: bmjopen-2022-069017supp001.pdf [file bmjopen-2022-069017supp001.pdf]

### Topic guide - Skills Development for Patient-facing Work in Primary Care

- Details of PCN role – job title, when took up current post (or first worked in general practice setting), overview of current roles, brief career history
- PCN experience – views and experiences of PCN, relationship with colleagues during transition to general practice setting, local arrangements for integrating, managing and supervising clinical pharmacists, PCN level of maturity, pros and cons of working within particular operational model, any role in the integration of new clinical pharmacists, autonomy to shape PCN direction
- Patient facing practice – current and past, what “person-centredness” means in own practice
- Training for person-centred consultation practice – experience and suitability of training to become a person-centred practitioner (incl. most valued and gaps), experience of current or prior CPPE pathway, views on current PCPEP via direct experience and supervising others
- Medication reviews – understanding of the new Structured Medication Review (SMR), local implementation of SMRs, personal approach to medication reviews, alcohol within medication reviews
